# Supplementary material for: Indexing Resilience to Heat and Drought Stress in the Wild Relatives of Rapeseed-Mustard
Source: MDPI journal article supplement (doi:10.3390/life13030738), 2023-03-09
Supplement: s1 [file s1]

**Table S1- Percent decrease in germination for different *Brassica* sp. under stress conditions over control**

| S.no. | Species /Genotypes                      | Days to Germination |   |         |             |           |            | Germination Percentage |     |         |         |             |         |           |         |            |         |
|-------|-----------------------------------------|---------------------|---|---------|-------------|-----------|------------|------------------------|-----|---------|---------|-------------|---------|-----------|---------|------------|---------|
|       |                                         | Heat                |   | Drought |             |           |            | Heat                   |     |         | Drought |             |         |           |         |            |         |
|       |                                         | C                   | T | C       | 2.5%<br>PEG | 5%<br>PEG | 10%<br>PEG | C                      | T   | %Change | C       | 2.5%<br>PEG | %Change | 5%<br>PEG | %Change | 10%<br>PEG | %Change |
| 1     | <i>Brassica fruticulosa</i>             | 1                   | 1 | 1       | 1           | 1         | 1          | 90                     | 30  | 66.67 ↓ | 100     | 45          | 55↓     | 60        | 40↓     | 75         | 25↓     |
| 2     | <i>Brassica fruticulosa</i> (Spain)     | 3                   | 3 | 3       | 3           | 3         | 3          | 65                     | 30  | 53.85↓  | 80      | 100         | 25↑     | 100       | 25↑     | 50         | 37.5↓   |
| 3     | <i>Brassica tournefortii</i> (RBT 2002) | 1                   | 1 | 1       | 1           | 1         | 1          | 85                     | 75  | 11.76↓  | 90      | 95          | 5.55↑   | 95        | 5.55↑   | 100        | 11.11↑  |
| 4     | <i>Brassica tournefortii</i> (RBT 2003) | 1                   | 1 | 1       | 1           | 1         | 1          | 85                     | 80  | 5.88↓   | 90      | 90          | 0       | 100       | 11.11↑  | 100        | 11.11↑  |
| 5     | <i>Camelina sativa</i>                  | 1                   | 1 | 1       | 1           | 1         | 1          | 90                     | 90  | 0       | 100     | 100         | 0       | 100       | 0       | 100        | 0       |
| 6     | <i>Capsella bursa-pastoris</i> (early)  | 3                   | 3 | 3       | 3           | 3         | 3          | 95                     | 35  | 63.16↓  | 100     | 100         | 0       | 100       | 0       | 100        | 0       |
| 7     | <i>Capsella bursa-pastoris</i> (late)   | 3                   | 3 | 3       | 3           | 3         | 3          | 85                     | 80  | 5.88↓   | 100     | 100         | 0       | 100       | 0       | 100        | 0       |
| 8     | <i>Diplotaxis assurgens</i>             | 1                   | 1 | 1       | 1           | 1         | 1          | 80                     | 90  | 12.50↑  | 90      | 95          | 5.55↑   | 100       | 11.11↑  | 100        | 11.11↑  |
| 9     | <i>Diplotaxis catholica</i>             | 1                   | 1 | 1       | 1           | 1         | 1          | 95                     | 90  | 5.26↓   | 80      | 95          | 18.75↑  | 95        | 18.75↑  | 100        | 25↑     |
| 10    | <i>Diplotaxis cretacia</i>              | 1                   | 1 | 1       | 1           | 1         | 1          | 100                    | 60  | 40↓     | 80      | 100         | 25↑     | 100       | 25↑     | 100        | 25↑     |
| 11    | <i>Diplotaxis eruroides</i>             | 1                   | 1 | 1       | 1           | 1         | 1          | 0                      | 0   | -       | 80      | 80          | 0       | 100       | 25↑     | 100        | 25↑     |
| 12    | <i>Diplotaxis gomez-campo</i>           | 1                   | 1 | 1       | 1           | 1         | 1          | 90                     | 85  | 5.56↓   | 60      | 90          | 50↑     | 100       | 66.66↑  | 100        | 66.66↑  |
| 13    | <i>Diplotaxis muralis</i>               | 1                   | 1 | 1       | 1           | 1         | 1          | 100                    | 60  | 40↓     | 85      | 95          | 11.76↑  | 50        | 41.17↓  | 50         | 41.17↓  |
| 14    | <i>Diplotaxis tenuisiliqua</i>          | 1                   | 1 | 1       | 1           | 1         | 1          | 100                    | 60  | 40↓     | 100     | 95          | 5↓      | 100       | 0       | 100        | 0       |
| 15    | <i>Diplotaxis viminea</i>               | 1                   | 1 | 1       | 1           | 1         | 1          | 95                     | 75  | 21.05   | 90      | 85          | 5.55↓   | 80        | 11.11↓  | 90         | 0       |
| 16    | <i>Lepidium sativum</i>                 | 1                   | 1 | 1       | 1           | 1         | 1          | 80                     | 100 | 25.00↑  | 85      | 100         | 17.64↑  | 100       | 17.64↑  | 100        | 17.64↑  |
| 17    | <i>Sinapis alba</i>                     | 1                   | 1 | 1       | 1           | 1         | 1          | 80                     | 80  | 0       | 95      | 85          | 10.52↓  | 80        | 15.78↓  | 95         | 0       |
| 18    | <i>Crambe abyssinica</i> (EC400058)     | 3                   | 3 | 3       | 3           | 3         | 3          | 90                     | 60  | 33.33↓  | 60      | 65          | 8.33↑   | 75        | 25↑     | 95         | 58.33↑  |
| 19    | <i>Crambe abyssinica</i> (EC694145)     | 1                   | 1 | 1       | 1           | 1         | 1          | 75                     | 45  | 40↓     | 80      | 80          | 0       | 90        | 12.5↑   | 90         | 12.5↑   |

|    |                                     |   |   |   |   |   |   |     |     |        |     |     |        |     |        |     |        |
|----|-------------------------------------|---|---|---|---|---|---|-----|-----|--------|-----|-----|--------|-----|--------|-----|--------|
| 20 | <i>Eruca sativa</i> (IC57706)       | 1 | 1 | 1 | 1 | 1 | 1 | 85  | 75  | 11.76↓ | 80  | 95  | 18.75↑ | 95  | 18.75↑ | 100 | 25↑    |
| 21 | <i>Eruca sativa</i> (IC62713)       | 1 | 1 | 1 | 1 | 1 | 1 | 70  | 60  | 14.29↓ | 65  | 90  | 38.46↑ | 85  | 30.76↑ | 100 | 53.84↑ |
| 22 | <i>Biscutella didyma</i>            | 1 | 3 | 3 | 3 | 3 | 3 | 95  | 40  | 57.89↓ | 90  | 100 | 11.11↑ | 100 | 11.11↓ | 100 | 11.11↑ |
| 23 | <i>Oxycamp</i>                      | 1 | 3 | 3 | 3 | 3 | 3 | 0   | 0   | -      | 40  | 40  | 0      | 50  | 25↑    | 50  | 25↑    |
| 24 | <i>Brassica tournefortii</i> (Rawa) | 1 | 1 | 1 | 1 | 1 | 1 | 65  | 90  | 38.46↑ | 90  | 80  | 11.11↓ | 50  | 44.44↓ | 75  | 16.66↓ |
| 25 | <i>Brassica rapa</i> (IC374272)     | 1 | 1 | 1 | 1 | 1 | 1 | 100 | 100 | 0      | 100 | 100 | 0      | 100 | 0      | 100 | 0      |
| 26 | <i>B. juncea</i> (Pusa Jaikisan)    | 1 | 1 | 1 | 1 | 1 | 1 | 55  | 50  | 9.09↓  | 40  | 65  | 62.5↑  | 60  | 50↑    | 90  | 125↑   |
| 27 | <i>B. nigra</i> (EC472708)          | 1 | 1 | 1 | 1 | 1 | 1 | 100 | 75  | 25↓    | 100 | 100 | 0      | 100 | 0      | 100 | 0      |
| 28 | <i>B. napus</i> (GSC 6)             | 1 | 1 | 1 | 1 | 1 | 1 | 95  | 90  | 5.26↓  | 95  | 100 | 5.26↑  | 100 | 5.26↑  | 100 | 5.26↑  |
| 29 | <i>B. carinata</i> (PC-6)           | 1 | 1 | 1 | 1 | 1 | 1 | 100 | 80  | 20↓    | 100 | 100 | 0      | 100 | 0      | 100 | 0      |

C: Control and T: Treatment; ↑ and ↓denotes increase and decrease, respectively in germination under stress condition as compared to control

**Table S2- Tolerance index (TI) and membership function value (MFV) for trait germination percentage, shoot length and root length under heat stress.**

[illegible]

**Table S3-Shoot length and Root length of wild and U triangle species of Brassica germinated under different concentrations of PEG6000.**  
**Different letters denote a significant difference at  $p < 0.05$  based on the least significant difference (LSD) test.**

|       | Treatment                               | Control               |                          | 2.5% PEG             |                             |                        |                            | 5% PEG                |                             |                       |                            | 10% PEG              |                             |                      |                            |
|-------|-----------------------------------------|-----------------------|--------------------------|----------------------|-----------------------------|------------------------|----------------------------|-----------------------|-----------------------------|-----------------------|----------------------------|----------------------|-----------------------------|----------------------|----------------------------|
| S.no. | Genotype                                | Shoot length          | Root length              | Shoot length         | Fold change in shoot length | Root length            | Fold change in root length | Shoot length          | Fold change in shoot length | Root length           | Fold change in root length | Shoot length         | Fold change in shoot length | Root length          | Fold change in root length |
| 1     | <i>Brassica fruticulosa</i>             | 2.97 <sup>FEDG</sup>  | 3.07 <sup>HEGKDIFI</sup> | 1.4 <sup>NM</sup>    | 0.47                        | 1.17 <sup>GF</sup>     | 0.38                       | 1.27 <sup>MN</sup>    | 0.43                        | 1.2 <sup>M</sup>      | 0.39                       | 1.43 <sup>NM</sup>   | 0.48                        | 1.07 <sup>K</sup>    | 0.35                       |
| 2     | <i>Brassica fruticulosa</i> (Spain)     | 2.3 <sup>FHG</sup>    | 1.13 <sup>ML</sup>       | 2.17 <sup>HJGI</sup> | 0.94                        | 0.63 <sup>G</sup>      | 0.56                       | 2.57 <sup>HFEIG</sup> | 1.12                        | 2.23 <sup>MLK</sup>   | 1.97                       | 3.1 <sup>FGE</sup>   | 1.35                        | 4.57 <sup>FHIG</sup> | 4.03                       |
| 3     | <i>Brassica tournefortii</i> (RBT 2002) | 3.03 <sup>FCEDG</sup> | 4.3 <sup>EDF</sup>       | 2.93 <sup>EDF</sup>  | 0.97                        | 1.43 <sup>EGF</sup>    | 0.33                       | 2.57 <sup>HFEIG</sup> | 0.85                        | 5.07 <sup>HJGIF</sup> | 1.18                       | 2.43 <sup>JIGH</sup> | 0.8                         | 6.7 <sup>FED</sup>   | 1.56                       |
| 4     | <i>Brassica tournefortii</i> (RBT 2003) | 2.73 <sup>FEHDG</sup> | 2.93 <sup>HGKLJFI</sup>  | 2.83 <sup>EDF</sup>  | 1.04                        | 3.77 <sup>EDGCF</sup>  | 1.28                       | 2.83 <sup>HFEDG</sup> | 1.04                        | 4.33 <sup>HJGIK</sup> | 1.48                       | 2.8 <sup>FIGH</sup>  | 1.02                        | 6.23 <sup>FEG</sup>  | 2.13                       |
| 5     | <i>Camelina sativa</i>                  | 2.17 <sup>HG</sup>    | 2.53 <sup>HGKLJFI</sup>  | 2.07 <sup>HJKI</sup> | 0.95                        | 3.3 <sup>EDGF</sup>    | 1.3                        | 2.4 <sup>HFJIG</sup>  | 1.11                        | 5.47 <sup>HEGIF</sup> | 2.16                       | 2.93 <sup>FGH</sup>  | 1.35                        | 9.37 <sup>CBD</sup>  | 3.7                        |
| 6     | <i>Capsella bursa-pastoris</i> (early)  | 0.77 <sup>I</sup>     | 0.63 <sup>M</sup>        | 1.4 <sup>NM</sup>    | 1.83                        | 0.5 <sup>G</sup>       | 0.79                       | 1.07 <sup>N</sup>     | 1.39                        | 0.77 <sup>M</sup>     | 1.21                       | 1.57 <sup>NML</sup>  | 2.04                        | 1.47 <sup>JK</sup>   | 2.32                       |
| 7     | <i>Capsella bursa-pastoris</i> (late)   | 0.9 <sup>I</sup>      | 0.37 <sup>M</sup>        | 1.13 <sup>N</sup>    | 1.26                        | 0.5 <sup>G</sup>       | 1.36                       | 1.2 <sup>MN</sup>     | 1.33                        | 0.73 <sup>M</sup>     | 2                          | 2.43 <sup>JIGH</sup> | 2.7                         | 1.6 <sup>JK</sup>    | 4.36                       |
| 8     | <i>Diplotaxis assurgens</i>             | 2.1 <sup>HG</sup>     | 1.13 <sup>ML</sup>       | 1.97 <sup>LJKI</sup> | 0.94                        | 9.07 <sup>A</sup>      | 8                          | 1.67 <sup>MKJNL</sup> | 0.79                        | 2.07 <sup>MLK</sup>   | 1.82                       | 2.07 <sup>JMKL</sup> | 0.98                        | 2.97 <sup>JKHI</sup> | 2.62                       |
| 9     | <i>Diplotaxis catholica</i>             | 2.47 <sup>FEHG</sup>  | 2.57 <sup>HGKLJFI</sup>  | 2.27 <sup>HGI</sup>  | 0.92                        | 2.17 <sup>EDGF</sup>   | 0.84                       | 2.1 <sup>HKJI</sup>   | 0.85                        | 1.67 <sup>MLK</sup>   | 0.65                       | 2.53 <sup>JIGH</sup> | 1.03                        | 2.7 <sup>JKI</sup>   | 1.05                       |
| 10    | <i>Diplotaxis cretacia</i>              | 2.47 <sup>FEHG</sup>  | 1.83 <sup>HMKLJI</sup>   | 1.6 <sup>LKNM</sup>  | 0.65                        | 1.57 <sup>EGF</sup>    | 0.85                       | 2.07 <sup>HKIJL</sup> | 0.84                        | 2.7 <sup>MJLIK</sup>  | 1.47                       | 2.23 <sup>JKIL</sup> | 0.91                        | 2.47 <sup>JKI</sup>  | 1.35                       |
| 11    | <i>Diplotaxis eruroides</i>             | 2.2 <sup>FHG</sup>    | 3.1 <sup>HEGKDIFI</sup>  | 1.53 <sup>LNMI</sup> | 0.7                         | 2.37 <sup>EDGF</sup>   | 0.76                       | 2.13 <sup>HKIJ</sup>  | 0.97                        | 2.33 <sup>MJLK</sup>  | 0.75                       | 2.47 <sup>JIGH</sup> | 1.12                        | 3.43 <sup>JKHI</sup> | 1.11                       |
| 12    | <i>Diplotaxis gomez-campoi</i>          | 2.1 <sup>HG</sup>     | 1.13 <sup>ML</sup>       | 1.93 <sup>LJKI</sup> | 0.92                        | 1.77 <sup>EGF</sup>    | 1.56                       | 2 <sup>MKJIL</sup>    | 0.95                        | 1.47 <sup>ML</sup>    | 1.29                       | 1.7 <sup>NMKL</sup>  | 0.81                        | 2.37 <sup>JKI</sup>  | 2.09                       |
| 13    | <i>Diplotaxis muralis</i>               | 1.8 <sup>IH</sup>     | 1.43 <sup>MKLJ</sup>     | 1.3 <sup>NM</sup>    | 0.72                        | 1.57 <sup>EGF</sup>    | 1.09                       | 1.7 <sup>MKJNL</sup>  | 0.94                        | 1.53 <sup>ML</sup>    | 1.07                       | 1.37 <sup>N</sup>    | 0.76                        | 2.37 <sup>JKI</sup>  | 1.65                       |
| 14    | <i>Diplotaxis tenuisiliqua</i>          | 2.17 <sup>HG</sup>    | 2.07 <sup>HMGKLJI</sup>  | 1.63 <sup>LKM</sup>  | 0.75                        | 1.73 <sup>EGF</sup>    | 0.84                       | 2.13 <sup>HKIJ</sup>  | 0.98                        | 1.8 <sup>MLK</sup>    | 0.87                       | 2.27 <sup>JKH</sup>  | 1.05                        | 3.43 <sup>JKHI</sup> | 1.66                       |
| 15    | <i>Diplotaxis viminea</i>               | 2.47 <sup>FEHG</sup>  | 1.23 <sup>MKL</sup>      | 2.3 <sup>HGI</sup>   | 0.93                        | 2.17 <sup>EDGF</sup>   | 1.76                       | 2 <sup>MKJIL</sup>    | 0.81                        | 3 <sup>MJLIK</sup>    | 2.43                       | 2.03 <sup>NMKL</sup> | 0.82                        | 2.9 <sup>JKHI</sup>  | 2.35                       |
| 16    | <i>Lepidium sativum</i>                 | 2.87 <sup>FEHDG</sup> | 3.83 <sup>EGDF</sup>     | 3.07 <sup>ED</sup>   | 1.07                        | 6.03 <sup>BDAC</sup>   | 1.57                       | 3.2 <sup>FEDC</sup>   | 1.12                        | 6.17 <sup>HEGDF</sup> | 1.61                       | 3.3 <sup>FDE</sup>   | 1.15                        | 5.4 <sup>FHEG</sup>  | 1.41                       |
| 17    | <i>Sinapis alba</i>                     | 3.2 <sup>FCEBDG</sup> | 3.43 <sup>HEGDFI</sup>   | 2.47 <sup>HGF</sup>  | 0.77                        | 4.37 <sup>EBDGCF</sup> | 1.27                       | 3.63 <sup>BDC</sup>   | 1.14                        | 8.73 <sup>BDC</sup>   | 2.54                       | 3.93 <sup>CD</sup>   | 1.23                        | 11.6 <sup>B</sup>    | 3.38                       |
| 18    | <i>Crambe abyssinica</i> (EC400058)     | 3.57 <sup>CEBD</sup>  | 3.27 <sup>HEGKDIFI</sup> | 2.8 <sup>EDF</sup>   | 0.79                        | 3.33 <sup>EDGF</sup>   | 1.02                       | 4.03 <sup>BA</sup>    | 1.13                        | 7.2 <sup>EDF</sup>    | 2.2                        | 3.47 <sup>FDE</sup>  | 0.97                        | 4.33 <sup>FHIG</sup> | 1.33                       |
| 19    | <i>Crambe abyssinica</i> (EC694145)     | 3.87 <sup>CBD</sup>   | 3.03 <sup>HEGKLJFI</sup> | 3.57 <sup>CB</sup>   | 0.92                        | 3.1 <sup>EDGF</sup>    | 1.02                       | 4 <sup>BAC</sup>      | 1.03                        | 6.47 <sup>HEGDF</sup> | 2.13                       | 3.43 <sup>FDE</sup>  | 0.89                        | 4.73 <sup>FHIG</sup> | 1.56                       |
| 20    | <i>Eruca sativa</i> (IC57706)           | 4.33 <sup>B</sup>     | 4.83 <sup>ED</sup>       | 3.73 <sup>CB</sup>   | 0.86                        | 6.17 <sup>BDAC</sup>   | 1.28                       | 3.33 <sup>BEDC</sup>  | 0.77                        | 7.1 <sup>EGDF</sup>   | 1.47                       | 5.47 <sup>A</sup>    | 1.26                        | 9.43 <sup>CB</sup>   | 1.95                       |
| 21    | <i>Eruca sativa</i> (IC62713)           | 5.63 <sup>A</sup>     | 11.5 <sup>A</sup>        | 4.9 <sup>A</sup>     | 0.87                        | 4.47 <sup>EBDGCF</sup> | 0.39                       | 4.8 <sup>A</sup>      | 0.85                        | 10.7 <sup>BAC</sup>   | 0.93                       | 5.53 <sup>A</sup>    | 0.98                        | 10.47 <sup>B</sup>   | 0.91                       |

|    |                                        |                        |                       |                     |      |                       |      |                       |      |                       |      |                      |      |                       |      |
|----|----------------------------------------|------------------------|-----------------------|---------------------|------|-----------------------|------|-----------------------|------|-----------------------|------|----------------------|------|-----------------------|------|
| 22 | <i>Biscutella didyma</i>               | 2.47 <sup>FEHG</sup>   | 1.63 <sup>MKLJI</sup> | 2.27 <sup>HGI</sup> | 0.92 | 1.73 <sup>EGF</sup>   | 1.06 | 2.3 <sup>HKJIG</sup>  | 0.93 | 2.4 <sup>MJLK</sup>   | 1.47 | 1.6N <sup>MKL</sup>  | 0.65 | 2.73 <sup>JKHI</sup>  | 1.67 |
| 23 | <i>Oxycamp</i>                         | 0                      | 1.3                   | 1.7 <sup>LJKM</sup> | 0    | 1.43 <sup>EGF</sup>   | 1.1  | 1.53 <sup>MKNL</sup>  | 0    | 1.2 <sup>M</sup>      | 0.92 | 2.47 <sup>JIGH</sup> | 0    | 1.4 <sup>K</sup>      | 1.08 |
| 24 | <i>Brassica tournefortii</i><br>(Rawa) | 0                      | 2.05                  | 2.6 <sup>EGF</sup>  | 0    | 3.1 <sup>EDGF</sup>   | 1.51 | 1.67 <sup>MKJNL</sup> | 0    | 2.83 <sup>EDC</sup>   | 1.38 | 2.5 <sup>JIGH</sup>  | 0    | 4.13 <sup>JFHIG</sup> | 2.02 |
| 25 | <i>B. rapa</i> (IC374272)              | 3.73 <sup>CBD</sup>    | 6.97 <sup>D</sup>     | 3.27 <sup>CD</sup>  | 0.88 | 3.83 <sup>EDGF</sup>  | 0.55 | 3.17 <sup>FED</sup>   | 0.85 | 8.17 <sup>EDC</sup>   | 1.17 | 3.33 <sup>FDE</sup>  | 0.89 | 7.57 <sup>CED</sup>   | 1.09 |
| 26 | <i>B. juncea</i> (Pusa Jaikisan)       | 3.33 <sup>FCEBD</sup>  | 3.67 <sup>HEGDF</sup> | 3.97 <sup>B</sup>   | 1.19 | 5.2 <sup>EBDACF</sup> | 1.42 | 3.33 <sup>BEDC</sup>  | 1    | 4.1 <sup>HJLIK</sup>  | 1.12 | 3.67 <sup>CDE</sup>  | 1.1  | 3.57 <sup>JKHIG</sup> | 0.97 |
| 27 | <i>B. nigra</i> (EC472708)             | 4.13 <sup>B</sup>      | 7.83 <sup>C</sup>     | 3.7 <sup>CB</sup>   | 0.9  | 5.43 <sup>EBDAC</sup> | 0.69 | 3.2 <sup>FEDC</sup>   | 0.77 | 6.87 <sup>HJLIK</sup> | 0.88 | 4.2 <sup>CB</sup>    | 1.02 | 9.67 <sup>CB</sup>    | 1.23 |
| 28 | <i>B. napus</i> (GSC 6)                | 4.2 <sup>B</sup>       | 10.43 <sup>BA</sup>   | 3.97 <sup>B</sup>   | 0.94 | 7.6 <sup>BAC</sup>    | 0.73 | 3.57 <sup>BDC</sup>   | 0.85 | 11.2 <sup>BA</sup>    | 1.07 | 4.7 <sup>B</sup>     | 1.12 | 15.67 <sup>A</sup>    | 1.5  |
| 29 | <i>B. carinata</i> (PC-6)              | 3.23 <sup>FCEBDG</sup> | 9.4 <sup>BC</sup>     | 3.57 <sup>CB</sup>  | 1.1  | 8.43 <sup>BA</sup>    | 0.9  | 3.1 <sup>FEDG</sup>   | 0.96 | 12.17 <sup>A</sup>    | 1.29 | 3.03 <sup>FGE</sup>  | 0.94 | 14.6 <sup>A</sup>     | 1.55 |

**Table S4- Tolerance index (TI) and membership function value (MFV) for trait survival percentage and MDA under heat stress**

[illegible]

**Table S5- Tolerance index (TI) and membership function value (MFV) for trait shoot length and root length at 2.5% PEG6000**

| S.no. | Genotype                                | Control      |             | 2.5% PEG     |     |      |             | TI  | MFV |
|-------|-----------------------------------------|--------------|-------------|--------------|-----|------|-------------|-----|-----|
|       |                                         | Shoot Length | Root Length | Shoot Length | TI  | MFV  | Root Length |     |     |
| 1     | <i>Brassica fruticulosa</i>             | 3.0          | 3.1         | 1.4          | 0.5 | -0.2 | 1.2         | 0.4 | 0.0 |
| 2     | <i>Brassica fruticulosa (Spain)</i>     | 2.3          | 1.1         | 2.2          | 0.9 | 0.2  | 0.6         | 0.6 | 0.2 |
| 3     | <i>Brassica tournefortii (RBT 2002)</i> | 3.0          | 4.3         | 2.9          | 1.0 | 0.2  | 1.4         | 0.3 | 0.0 |
| 4     | <i>Brassica tournefortii (RBT 2003)</i> | 2.7          | 2.9         | 2.8          | 1.0 | 0.3  | 3.8         | 1.3 | 0.9 |
| 5     | <i>Camelina sativa</i>                  | 2.2          | 2.5         | 2.1          | 1.0 | 0.2  | 3.3         | 1.3 | 0.9 |
| 6     | <i>Capsella bursa-pastoris (early)</i>  | 0.8          | 0.6         | 1.4          | 1.8 | 1.1  | 0.5         | 0.8 | 0.4 |
| 7     | <i>Capsella bursa-pastoris (Late)</i>   | 0.9          | 0.4         | 1.1          | 1.3 | 0.5  | 0.5         | 1.4 | 1.0 |
| 8     | <i>Diplotaxis assurgens</i>             | 2.1          | 1.1         | 2.0          | 0.9 | 0.2  | 9.1         | 8.0 | 7.6 |
| 9     | <i>Diplotaxis catholica</i>             | 2.5          | 2.6         | 2.3          | 0.9 | 0.2  | 2.2         | 0.8 | 0.5 |
| 10    | <i>Diplotaxis cretacia</i>              | 2.5          | 1.8         | 1.6          | 0.6 | -0.1 | 1.6         | 0.9 | 0.5 |
| 11    | <i>Diplotaxis erucoides</i>             | 2.2          | 3.1         | 1.5          | 0.7 | 0.0  | 2.4         | 0.8 | 0.4 |
| 12    | <i>Diplotaxis gomez-campo</i>           | 2.1          | 1.1         | 1.9          | 0.9 | 0.2  | 1.8         | 1.6 | 1.2 |
| 13    | <i>Diplotaxis muralis</i>               | 1.8          | 1.4         | 1.3          | 0.7 | 0.0  | 1.6         | 1.1 | 0.7 |
| 14    | <i>Diplotaxis tenuisilique</i>          | 2.2          | 2.1         | 1.6          | 0.8 | 0.0  | 1.7         | 0.8 | 0.5 |
| 15    | <i>Diplotaxis viminea</i>               | 2.5          | 1.2         | 2.3          | 0.9 | 0.2  | 2.2         | 1.8 | 1.4 |
| 16    | <i>Lepidium sativum</i>                 | 2.9          | 3.8         | 3.1          | 1.1 | 0.3  | 6.0         | 1.6 | 1.2 |
| 17    | <i>Sinapis alba</i>                     | 3.2          | 3.4         | 2.5          | 0.8 | 0.0  | 4.4         | 1.3 | 0.9 |
| 18    | <i>Crambe abyssinica (EC400058)</i>     | 3.6          | 3.3         | 2.8          | 0.8 | 0.1  | 3.3         | 1.0 | 0.6 |
| 19    | <i>Crambe abyssinica (EC694145)</i>     | 3.9          | 3.0         | 3.6          | 0.9 | 0.2  | 3.1         | 1.0 | 0.7 |
| 20    | <i>Eruca sativa (IC57706)</i>           | 4.3          | 4.8         | 3.7          | 0.9 | 0.1  | 6.2         | 1.3 | 0.9 |
| 21    | <i>Eruca sativa (IC62713)</i>           | 5.6          | 11.5        | 4.9          | 0.9 | 0.1  | 4.5         | 0.4 | 0.0 |
| 22    | <i>Biscutella didyma</i>                | 2.5          | 1.6         | 2.3          | 0.9 | 0.2  | 1.7         | 1.1 | 0.7 |
| 23    | <i>B. rapa (IC374272)</i>               | 3.7          | 7.0         | 3.3          | 0.9 | 0.1  | 3.8         | 0.6 | 0.2 |
| 24    | <i>B. juncea (Pusa Jaikisan)</i>        | 3.3          | 3.7         | 4.0          | 1.2 | 0.5  | 5.2         | 1.4 | 1.0 |
| 25    | <i>B. nigra (EC472708)</i>              | 4.1          | 7.8         | 3.7          | 0.9 | 0.2  | 5.4         | 0.7 | 0.3 |
| 26    | <i>B.napus (GSC 6)</i>                  | 4.2          | 10.4        | 4.0          | 0.9 | 0.2  | 7.6         | 0.7 | 0.4 |
| 27    | <i>B. carinata (PC-6)</i>               | 3.2          | 9.4         | 3.6          | 1.1 | 0.4  | 8.4         | 0.9 | 0.5 |

**Table S6- Tolerance index (TI) and membership function value (MFV) for trait shoot length and root length at 5% and 10% PEG6000**

|    | Genotype                                | 5% PEG       |     |      |             |     |     | 10% PEG      |     |      |             |     |     |
|----|-----------------------------------------|--------------|-----|------|-------------|-----|-----|--------------|-----|------|-------------|-----|-----|
|    |                                         | Shoot Length | TI  | MFV  | Root Length | TI  | MFV | Shoot Length | TI  | MFV  | Root Length | TI  | MFV |
| 1  | <i>Brassica fruticulosa</i>             | 1.3          | 0.4 | -0.2 | 1.2         | 0.4 | 0.1 | 1.4          | 0.5 | -0.1 | 1.1         | 0.3 | 0.2 |
| 2  | <i>Brassica fruticulosa</i> (Spain)     | 2.6          | 1.1 | 0.4  | 2.2         | 2.0 | 1.4 | 3.1          | 1.3 | 0.7  | 4.6         | 4.0 | 3.6 |
| 3  | <i>Brassica tournefortii</i> (RBT 2002) | 2.6          | 0.8 | 0.1  | 5.1         | 1.2 | 0.6 | 2.4          | 0.8 | 0.1  | 6.7         | 1.6 | 1.1 |
| 4  | <i>Brassica tournefortii</i> (RBT 2003) | 2.8          | 1.0 | 0.3  | 4.3         | 1.5 | 0.9 | 2.8          | 1.0 | 0.4  | 6.2         | 2.1 | 1.7 |
| 5  | <i>Camelina sativa</i>                  | 2.4          | 1.1 | 0.4  | 5.5         | 2.2 | 1.6 | 2.9          | 1.4 | 0.7  | 9.4         | 3.7 | 3.3 |
| 6  | <i>Capsella bursa-pastoris</i> (early)  | 1.1          | 1.4 | 0.7  | 0.8         | 1.2 | 0.7 | 1.6          | 2.0 | 1.4  | 1.5         | 2.3 | 1.9 |
| 7  | <i>Capsella bursa-pastoris</i> (Late)   | 1.2          | 1.3 | 0.6  | 0.7         | 2.0 | 1.5 | 2.4          | 2.7 | 2.0  | 1.6         | 4.4 | 3.9 |
| 8  | <i>Diplotaxis assurgens</i>             | 1.7          | 0.8 | 0.1  | 2.1         | 1.8 | 1.3 | 2.1          | 1.0 | 0.3  | 3.0         | 2.6 | 2.2 |
| 9  | <i>Diplotaxis catholica</i>             | 2.1          | 0.9 | 0.1  | 1.7         | 0.6 | 0.1 | 2.5          | 1.0 | 0.4  | 2.7         | 1.1 | 0.6 |
| 10 | <i>Diplotaxis cretacia</i>              | 2.1          | 0.8 | 0.1  | 2.7         | 1.5 | 0.9 | 2.2          | 0.9 | 0.2  | 2.5         | 1.3 | 0.9 |
| 11 | <i>Diplotaxis erucoides</i>             | 2.1          | 1.0 | 0.2  | 2.3         | 0.8 | 0.2 | 2.5          | 1.1 | 0.5  | 3.4         | 1.1 | 0.7 |
| 12 | <i>Diplotaxis gomez-campoi</i>          | 2.0          | 1.0 | 0.2  | 1.5         | 1.3 | 0.8 | 1.7          | 0.8 | 0.2  | 2.4         | 2.1 | 1.7 |
| 13 | <i>Diplotaxis muralis</i>               | 1.7          | 0.9 | 0.2  | 1.5         | 1.1 | 0.5 | 1.4          | 0.8 | 0.1  | 2.4         | 1.7 | 1.2 |
| 14 | <i>Diplotaxis tenuisiliqua</i>          | 2.1          | 1.0 | 0.2  | 1.8         | 0.9 | 0.3 | 2.3          | 1.0 | 0.4  | 3.4         | 1.7 | 1.2 |
| 15 | <i>Diplotaxis viminea</i>               | 2.0          | 0.8 | 0.1  | 3.0         | 2.4 | 1.9 | 2.0          | 0.8 | 0.2  | 2.9         | 2.4 | 1.9 |
| 16 | <i>Lepidium sativum</i>                 | 3.2          | 1.1 | 0.4  | 6.2         | 1.6 | 1.1 | 3.3          | 1.2 | 0.5  | 5.4         | 1.4 | 1.0 |
| 17 | <i>Sinapis alba</i>                     | 3.6          | 1.1 | 0.4  | 8.7         | 2.5 | 2.0 | 3.9          | 1.2 | 0.6  | 11.6        | 3.4 | 2.9 |
| 18 | <i>Crambe abyssinica</i> (EC400058)     | 4.0          | 1.1 | 0.4  | 7.2         | 2.2 | 1.7 | 3.5          | 1.0 | 0.3  | 4.3         | 1.3 | 0.9 |
| 19 | <i>Crambe abyssinica</i> (EC694145)     | 4.0          | 1.0 | 0.3  | 6.5         | 2.1 | 1.6 | 3.4          | 0.9 | 0.2  | 4.7         | 1.6 | 1.1 |
| 20 | <i>Eruca sativa</i> (IC57706)           | 3.3          | 0.8 | 0.0  | 7.1         | 1.5 | 0.9 | 5.5          | 1.3 | 0.6  | 9.4         | 2.0 | 1.5 |
| 21 | <i>Eruca sativa</i> (IC62713)           | 4.8          | 0.9 | 0.1  | 10.7        | 0.9 | 0.4 | 5.5          | 1.0 | 0.3  | 10.5        | 0.9 | 0.5 |
| 22 | <i>Biscutella didyma</i>                | 2.3          | 0.9 | 0.2  | 2.4         | 1.5 | 0.9 | 1.6          | 0.6 | 0.0  | 2.7         | 1.7 | 1.2 |
| 23 | <i>B. rapa</i> (IC374272)               | 3.2          | 0.8 | 0.1  | 8.2         | 1.2 | 0.6 | 3.3          | 0.9 | 0.2  | 7.6         | 1.1 | 0.7 |
| 24 | <i>B. juncea</i> (Pusa Jaikisan)        | 3.3          | 1.0 | 0.3  | 4.1         | 1.1 | 0.6 | 3.7          | 1.1 | 0.4  | 3.6         | 1.0 | 0.5 |
| 25 | <i>B. nigra</i> (EC472708)              | 3.2          | 0.8 | 0.0  | 6.9         | 0.9 | 0.3 | 4.2          | 1.0 | 0.4  | 9.7         | 1.2 | 0.8 |
| 26 | <i>B.napus</i> (GSC 6)                  | 3.6          | 0.8 | 0.1  | 11.2        | 1.1 | 0.5 | 4.7          | 1.1 | 0.5  | 15.7        | 1.5 | 1.1 |
| 27 | <i>B. carinata</i> (PC-6)               | 3.1          | 1.0 | 0.2  | 12.2        | 1.3 | 0.8 | 3.0          | 0.9 | 0.3  | 14.6        | 1.6 | 1.1 |





**Table S8-Tolerance index (TI) and membership function value (MFV) for trait survival percentage at 2.5%, 5% and 10% PEG6000**

| S. No. | Genotypes                               | C2.5% PEGSP | T2.5%PEG SP | TI  | MFV  | C5%PEG SP | T5%PEG SP | TI  | MFV | C10%PEG SP | T10%PEG SP | TI  | MFV |
|--------|-----------------------------------------|-------------|-------------|-----|------|-----------|-----------|-----|-----|------------|------------|-----|-----|
| 1      | <i>Brassica fruticulosa</i>             | 100.0       | 100.0       | 1.0 | -0.4 | 89.7      | 85.0      | 0.9 | 0.9 | 88.9       | 79.2       | 0.9 | 0.9 |
| 2      | <i>Brassica fruticulosa (Spain)</i>     | 100.0       | 100.0       | 1.0 | -0.4 | 87.5      | 89.5      | 1.0 | 1.0 | 71.4       | 66.7       | 0.9 | 0.9 |
| 3      | <i>Brassica tournefortii (RBT 2002)</i> | 100.0       | 100.0       | 1.0 | -0.4 | 82.4      | 70.8      | 0.9 | 0.9 | 54.5       | 28.6       | 0.5 | 0.5 |
| 4      | <i>Brassica tournefortii (RBT 2003)</i> | 100.0       | 69.4        | 0.7 | -0.7 | 69.2      | 38.5      | 0.6 | 0.6 | 63.0       | 42.9       | 0.7 | 0.7 |
| 5      | <i>Camelina sativa</i>                  | 100.0       | 94.3        | 0.9 | -0.4 | 83.3      | 72.0      | 0.9 | 0.9 | 44.4       | 21.4       | 0.5 | 0.5 |
| 6      | <i>Capsella bursa-pastoris (early)</i>  | 100.0       | 85.7        | 0.9 | -0.5 | 71.4      | 0.0       | 0.0 | 0.0 | 60.0       | 0.0        | 0.0 | 0.0 |
| 7      | <i>Capsella bursa-pastoris (late)</i>   | 100.0       | 100.0       | 1.0 | -0.4 | 82.4      | 62.5      | 0.8 | 0.8 | 54.5       | 54.5       | 1.0 | 1.0 |
| 8      | <i>Diplotaxis catholica</i>             | 100.0       | 100.0       | 1.0 | -0.4 | 63.6      | 52.4      | 0.8 | 0.8 | 52.4       | 50.0       | 1.0 | 1.0 |
| 9      | <i>Diplotaxis cretacia</i>              | 100.0       | 100.0       | 1.0 | -0.4 | 87.0      | 82.1      | 0.9 | 0.9 | 53.3       | 30.8       | 0.6 | 0.6 |
| 10     | <i>Diplotaxis muralis</i>               | 100.0       | 100.0       | 1.0 | -0.4 | 75.0      | 66.7      | 0.9 | 0.9 | 0.0        | 0.0        | 0   | 0   |
| 11     | <i>Diplotaxis viminea</i>               | 100.0       | 100.0       | 1.0 | -0.4 | 62.5      | 52.9      | 0.8 | 0.8 | 0.0        | 0.0        | 0   | 0   |
| 12     | <i>Lepidium sativum</i>                 | 100.0       | 100.0       | 1.0 | -0.4 | 87.5      | 77.1      | 0.9 | 0.9 | 50.0       | 0.0        | 0.0 | 0.0 |
| 13     | <i>Sinapis alba</i>                     | 100.0       | 78.1        | 0.8 | -0.6 | 63.6      | 22.7      | 0.4 | 0.4 | 64.3       | 23.5       | 0.4 | 0.4 |
| 14     | <i>Crambe abyssinica (EC400058)</i>     | 100.0       | 100.0       | 1.0 | -0.4 | 60.0      | 50.0      | 0.8 | 0.8 | 61.9       | 0.0        | 0.0 | 0.0 |
| 15     | <i>Crambe abyssinica (EC694145)</i>     | 100.0       | 90.0        | 0.9 | -0.5 | 63.0      | 50.0      | 0.8 | 0.8 | 55.6       | 28.6       | 0.5 | 0.5 |
| 16     | <i>Eruca sativa (IC57706)</i>           | 100.0       | 78.8        | 0.8 | -0.6 | 57.9      | 34.8      | 0.6 | 0.6 | 52.9       | 50.0       | 0.9 | 0.9 |
| 17     | <i>Eruca sativa (IC62713)</i>           | 100.0       | 82.8        | 0.8 | -0.6 | 65.2      | 36.8      | 0.6 | 0.6 | 54.5       | 0.0        | 0.0 | 0.0 |
| 18     | <i>Biscutella didyma</i>                | 100.0       | 88.0        | 0.9 | -0.5 | 58.3      | 0.0       | 0.0 | 0.0 | 53.3       | 0.0        | 0.0 | 0.0 |
| 19     | <i>Brassica rapa (IC374272)</i>         | 100.0       | 100.0       | 1.0 | -0.4 | 80.0      | 72.7      | 0.9 | 0.9 | 64.3       | 0.0        | 0.0 | 0.0 |
| 20     | <i>B. juncea (Pusa Jaikisan)</i>        | 100.0       | 100.0       | 1.0 | -0.4 | 58.3      | 53.9      | 0.9 | 0.9 | 64.3       | 16.7       | 0.3 | 0.3 |
| 21     | <i>B. nigra (EC472708)</i>              | 100.0       | 100.0       | 1.0 | -0.4 | 64.7      | 41.4      | 0.6 | 0.6 | 54.5       | 0.0        | 0.0 | 0.0 |
| 22     | <i>B.napus (GSC 6)</i>                  | 100.0       | 100.0       | 1.0 | -0.4 | 87.0      | 71.4      | 0.8 | 0.8 | 53.3       | 0.0        | 0.0 | 0.0 |
| 23     | <i>B. carinata (PC-6)</i>               | 100.0       | 78.0        | 0.8 | -0.6 | 68.4      | 54.6      | 0.8 | 0.8 | 61.5       | 0.0        | 0.0 | 0.0 |
